# Supplementary material
Source: PubMed Central journal article supplement (PMC5841869)
Supplement: jciinsight-2-93456-s001.pdf [file jciinsight-2-93456-s001.pdf]

Supplementary information

**Purinergic dysregulation causes hypertensive glaucoma-like optic neuropathy**

Youichi Shinozaki<sup>1</sup>, Kenji Kashiwagi<sup>2</sup>, Kazuhiko Namekata<sup>3</sup>, Akiko Takeda<sup>1</sup>, Nobuhiko Ohno<sup>3</sup>,  
Bernard Robaye<sup>5</sup>, Takayuki Harada<sup>3</sup>, Takeshi Iwata<sup>6</sup> and Schuichi Koizumi<sup>1,\*</sup>

<sup>1</sup>Department of Neuropharmacology, Interdisciplinary Graduate School of Medicine, University of Yamanashi, 1110 Shimokato, Chuo, Yamanashi 409-3898, Japan.

<sup>2</sup>Department of Ophthalmology, Interdisciplinary Graduate School of Medicine and Engineering, University of Yamanashi, 1110 Shimokato, Chuo, Yamanashi 409-3898, Japan.

<sup>3</sup>Visual Research Project, Tokyo Metropolitan Institute of Medical Science, 2-1-6 Kamikitazawa, Setagaya-ku, Tokyo 156-8506, Japan.

<sup>4</sup>Division of Neurobiology and Bioinformatics, National Institute for Physiological Sciences, 38 Nishigonaka Myodaiji, Okazaki, Aichi 444-8585, Japan.

<sup>5</sup>Institute of Interdisciplinary Research, Institute of Biology and Molecular Medicine, Université Libre de Bruxelles, Rue des Professeurs Jeener et Brachet 12, 6041 Gosselies, Belgium.

<sup>6</sup>Division of Molecular and Cellular Biology, National Institute of Sensory Organs, National Hospital Organization Tokyo Medical Center, 2-5-1, Higashigaoka, Meguro-ku, Tokyo 152-8902, Japan.

## Supplementary Figures

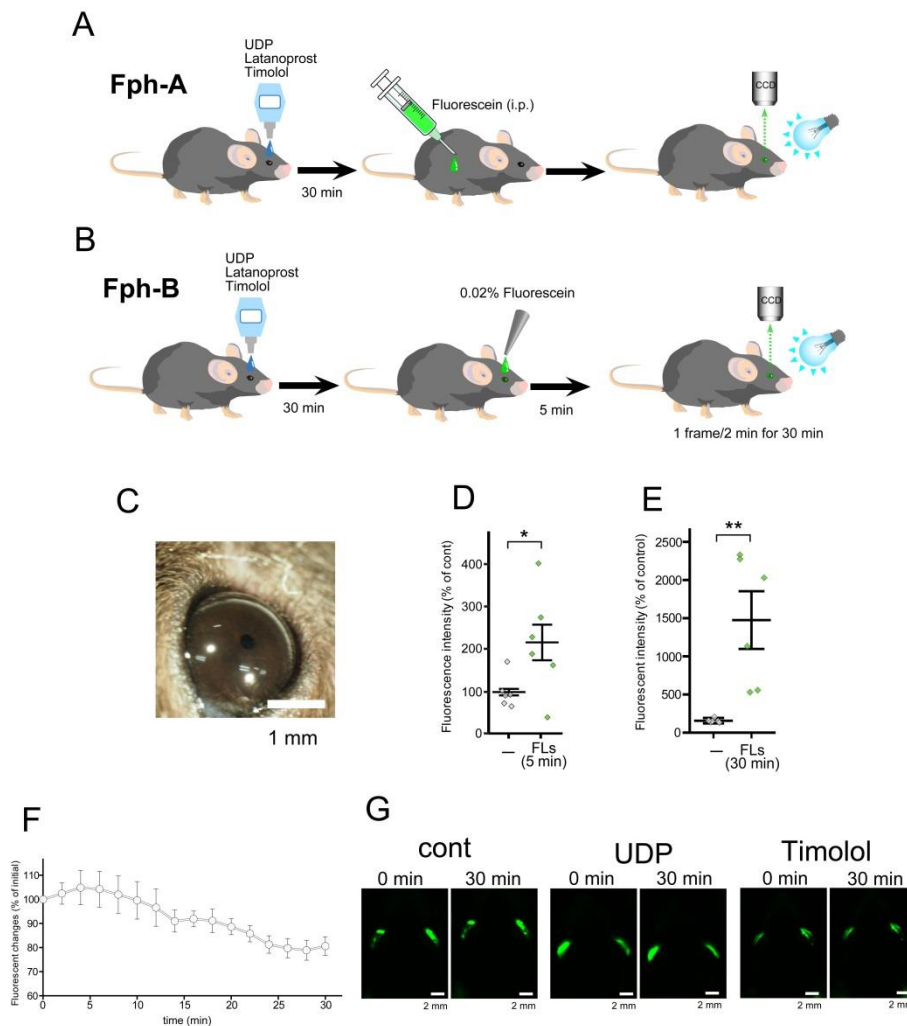

**Figure S1. Aqueous humor dynamics assays.**

(A) Fph-A procedures. Eye drops were administrated for 30 mins followed by fluorescein injection (i.p.). The fluorescence levels in the anterior chamber were monitored every 2 mins. (B) Fph-B procedures. Eye drops were administrated for 30 min followed by topical administration of fluorescein for 5 mins. After washing eyes with 500  $\mu$ l of saline five times, fluorescence images of the anterior chamber were observed. (C) Pupil dilations were not induced for the assays to observe fluorescence limited to the anterior chamber. (D, E) Fluorescence levels of isolated aqueous humor at (D) 5 and (E) 30 mins after i.p. injection of fluorescein. Fluorescence levels in isolated aqueous humor showed a significant increase ( $n = 5$ ,  $*p < 0.05$  and  $**p < 0.01$ , unpaired  $t$ -test). (F) Fluorescence changes in control mice. During the first 4–6 minutes, the fluorescence level was slightly increased followed by a gradual reduction. (G) Representative fluorescence images at 0 and 30 mins. Data are expressed as the mean  $\pm$  SEM.

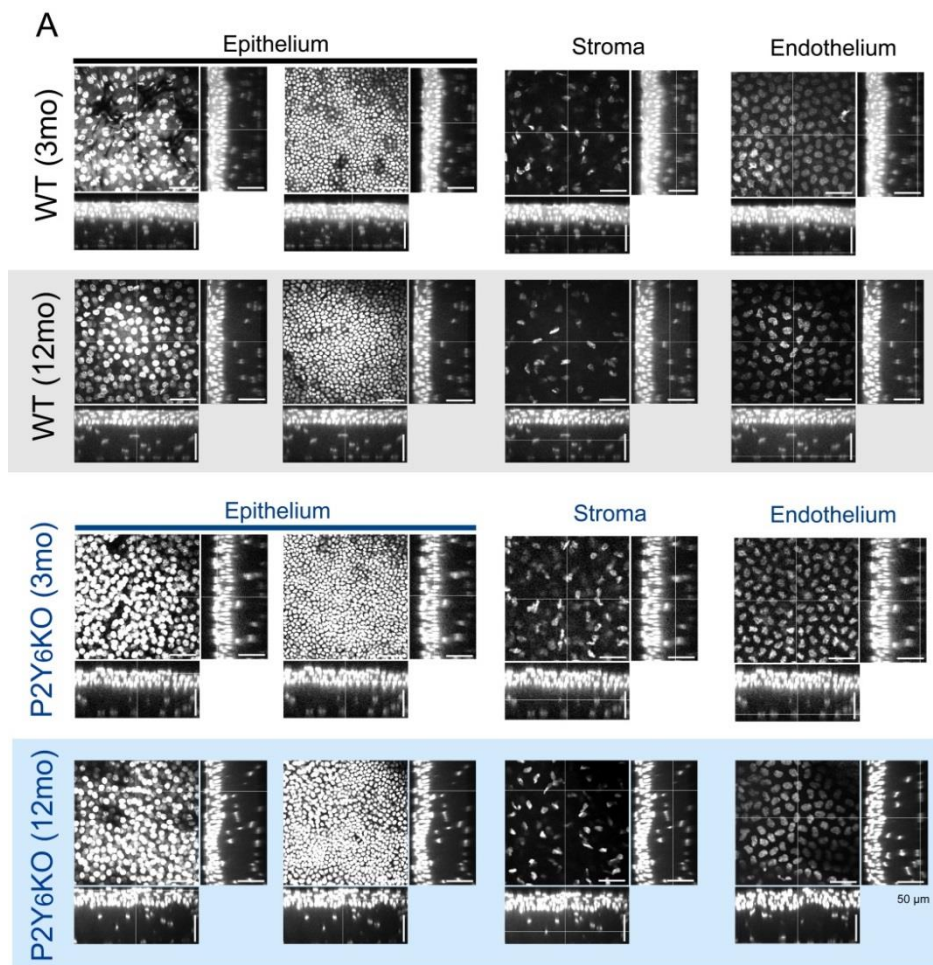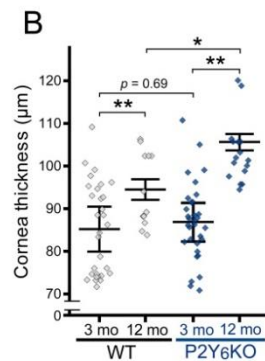

**Figure S2. Comparison of central cornea thickness between WT and P2Y<sub>6</sub>KO mice.**

(A) Layer structure of the cornea. No significant structural differences were observed in the epithelial, stromal and endothelial cell layers between WT and P2Y<sub>6</sub>KO mice. (B) Central cornea thickness (CCT). No significant differences in CCT at 3 months of age were observed. At 12 months, CCTs in both WT and P2Y<sub>6</sub>KO mice were increased compared with 3-month-old groups, and P2Y<sub>6</sub>KO had a thicker CCT than that of WT mice ( $n = 20$ ,  $*p < 0.05$ ,  $**p < 0.01$ , one-way ANOVA followed by Fisher's LSD test). Values are the mean  $\pm$  SEM. Scale bars: 50  $\mu\text{m}$ .

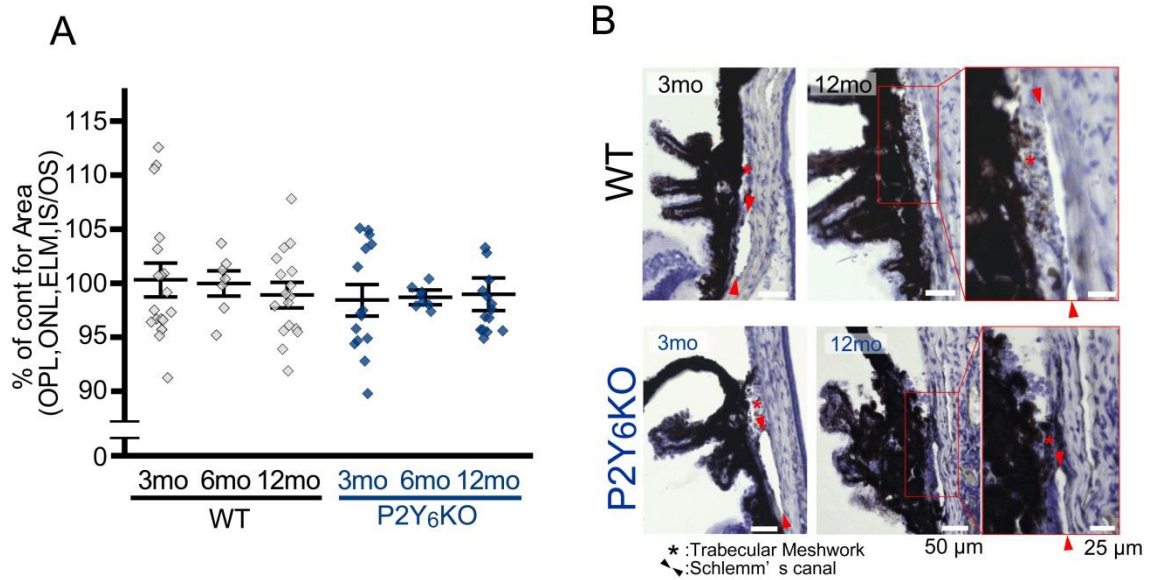

**Figure S3. Histological differences in WT and P2Y<sub>6</sub>KO mice.**

(A) No changes in area size of the outer retina (OPL, ONL, ELM, IS/OS) were observed by OCT analysis (n = 10–20, one-way ANOVA followed by Fisher's LSD test). (B) No significant abnormalities were observed in anterior chamber structures in P2Y<sub>6</sub>KO mice. Values are the mean ± SEM. Scale bars, 25 μm in (B, insert) and 50 μm in (B).

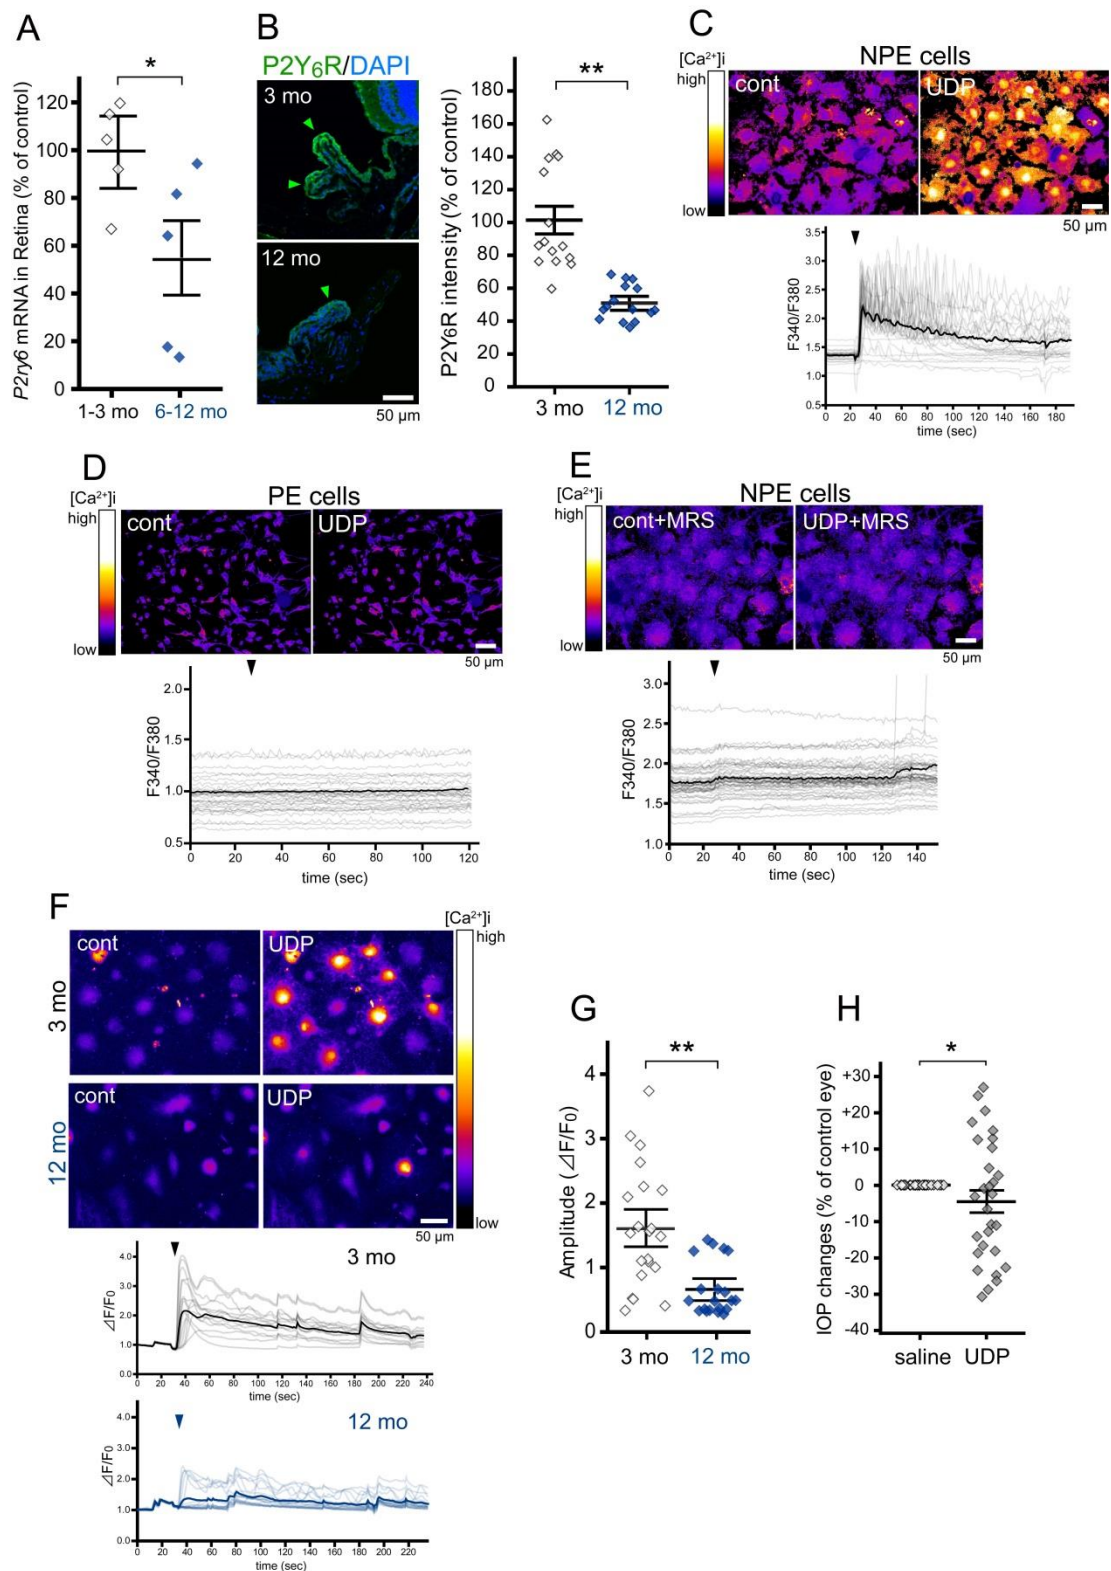

**Figure S4. Expression level of P2Y<sub>6</sub> receptors in the eye changes with aging.**

(A) The level of *P2ry6* mRNA in the retina was significantly reduced with age ( $n = 10$ ,  $*p = 0.05$ , unpaired  $t$ -test). Retinal *P2ry6* mRNA levels in WT mice at 6–12 months were

significantly lower compared with mice aged 1–3 months. **(B)** Immunoreactivity for P2Y<sub>6</sub>R in NPE cells of the ciliary body was decreased with age. Fluorescence intensities for P2Y<sub>6</sub>R signals in NPE cells of 3-month-old mice were significantly lower compared with those of 12-month-old mice (n = 10, \*\**p* < 0.01, unpaired *t*-test). **(C)** Nonpigmented epithelial (NPE) cells showed clear Ca<sup>2+</sup> responses evoked by UDP (100 μM, arrow). **(D)** Pigmented epithelial (PE) cells did not respond to UDP. **(E)** UDP-evoked responses in NPE cells were clearly blocked by MRS2578 (30 μM). Ca<sup>2+</sup> imaging in **(B–D)** were performed in epithelial cells from 3-month-old WT mice. **(F and G)** Age-associated reduction in UDP-evoked Ca<sup>2+</sup> responses in NPE cells. NPE cells from 12-month-old WT mice showed smaller amplitudes of Ca<sup>2+</sup> transients evoked by UDP (100 μM, arrow) compared with NPE cells from 3-month-old mice (n = 20, \*\**p* < 0.01, unpaired *t*-test). **(H)** IOP-lowering effect of UDP on WT mice aged 12 months. Instillation of UDP (500 μM, 5 μl/eye for 1.5 h) on 12-month old WT mice showed a 50% reduction in efficacy compared with 3-month-old WT mice (4.6±3.1 and 10.1±2.8% in 3- and 12-month-old WT mice, respectively). Scale bars, 50 μm in (B)-(F).
